# Supplementary material
Source: Springer Nature journal article supplement (https://www.springermedizin.de/resource/supplementary/13024_2014_578_MOESM6_ESM.pdf/9644420)

**a** 7 month-old A $\beta$ PP/PS1

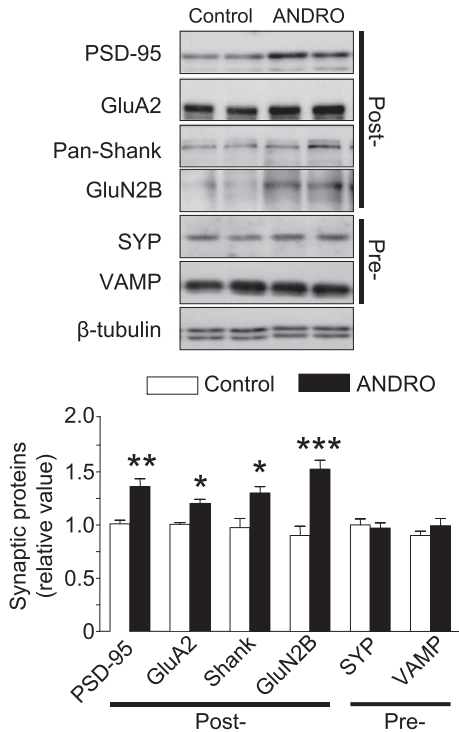

**b** 12 month-old A $\beta$ PP/PS1

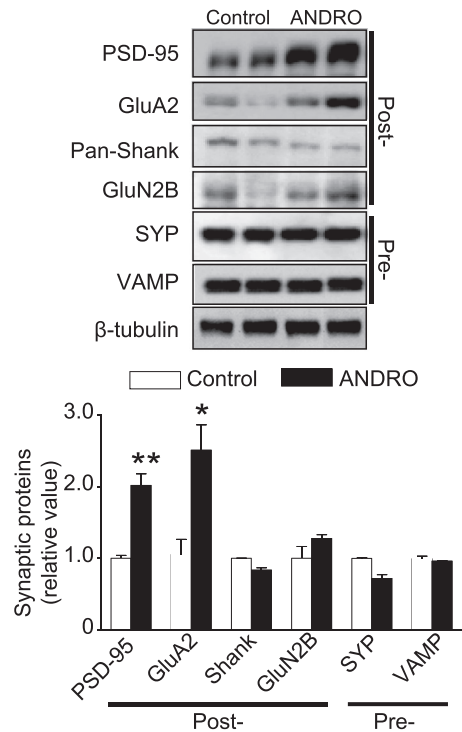

**c** Hippocampus

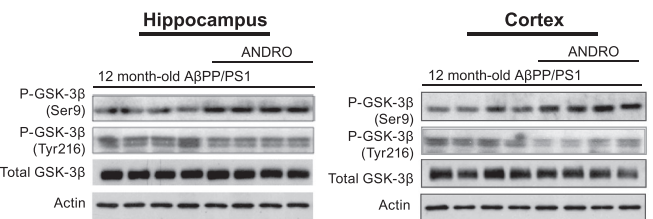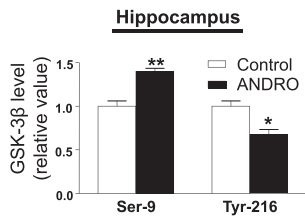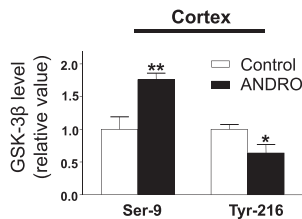

**d** Hippocampus

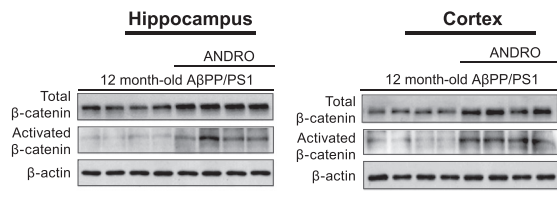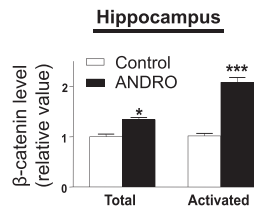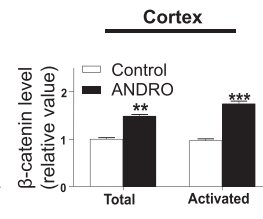

Supplement: MOESM6 [file 9644420]
